# Supplementary material
Source: MDPI journal article supplement (https://www.mdpi.com/2073-4441/16/9/1257)
Supplement: s1 [file s1 › water-2962907-supplementary.pdf]

## Supplementary Section

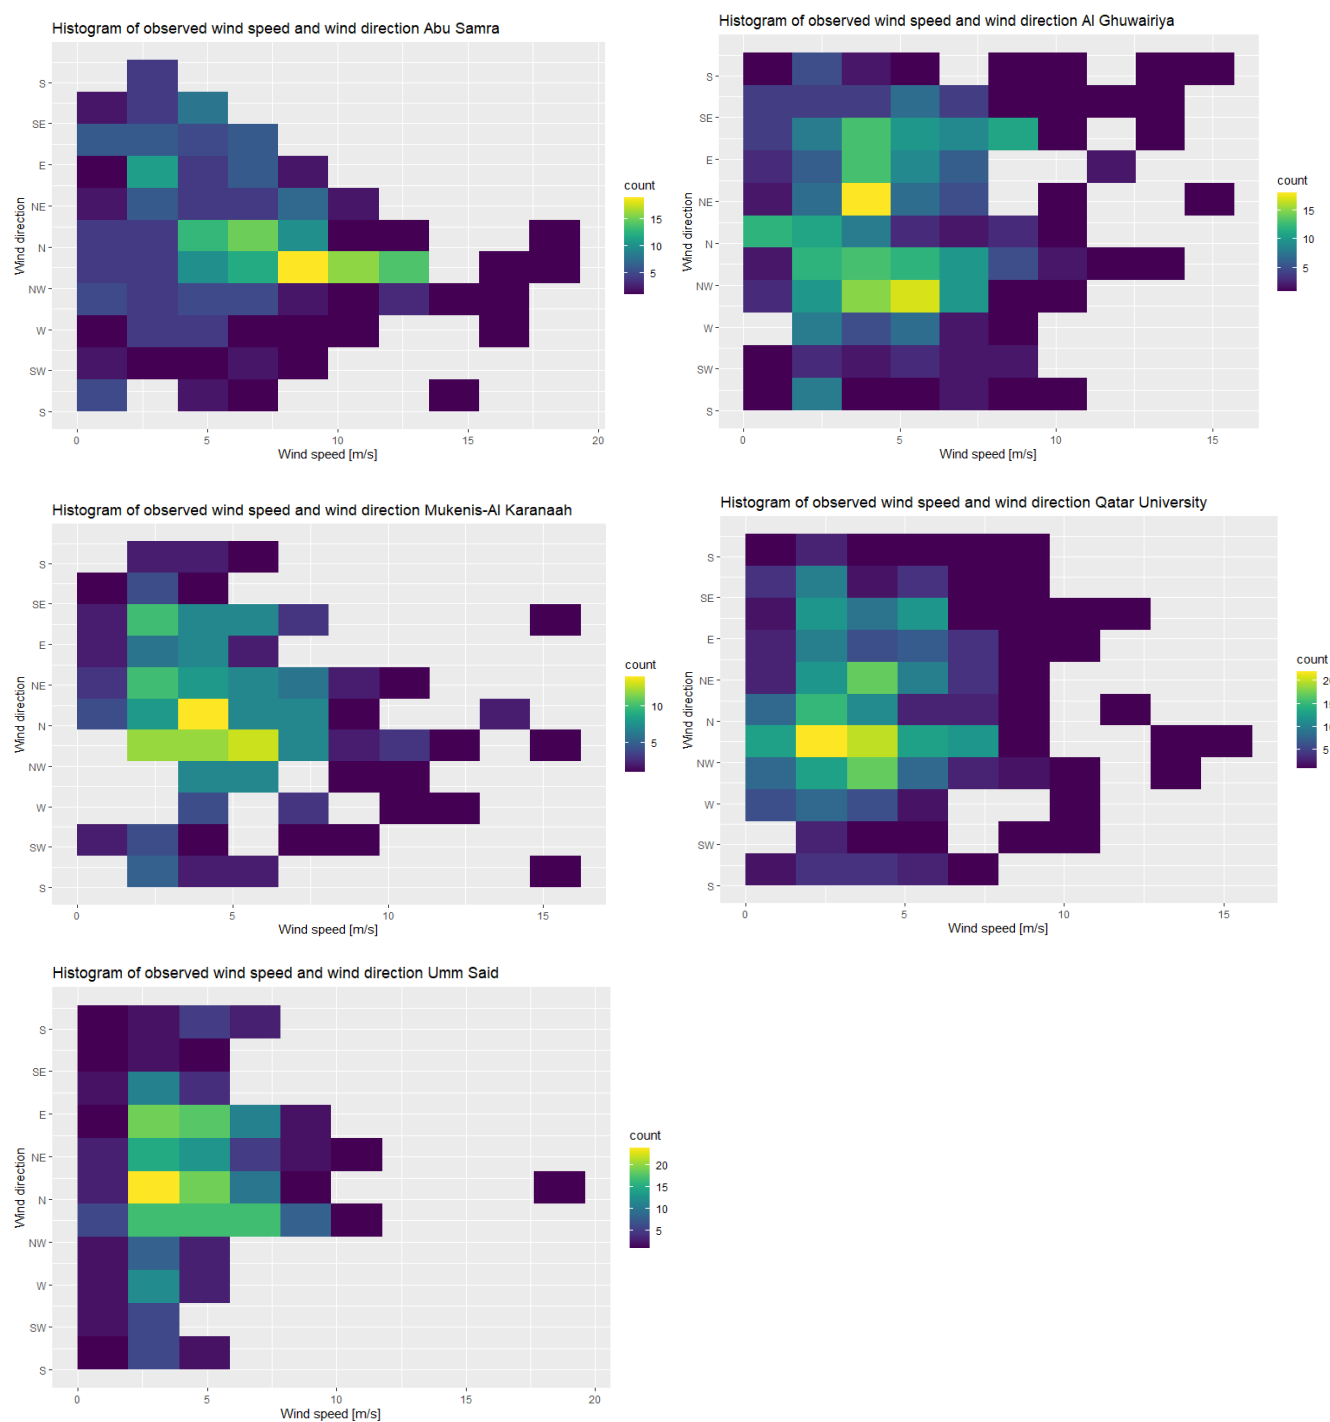

Figure S.1 The histogram of observed wind speed and direction for the individual stations.

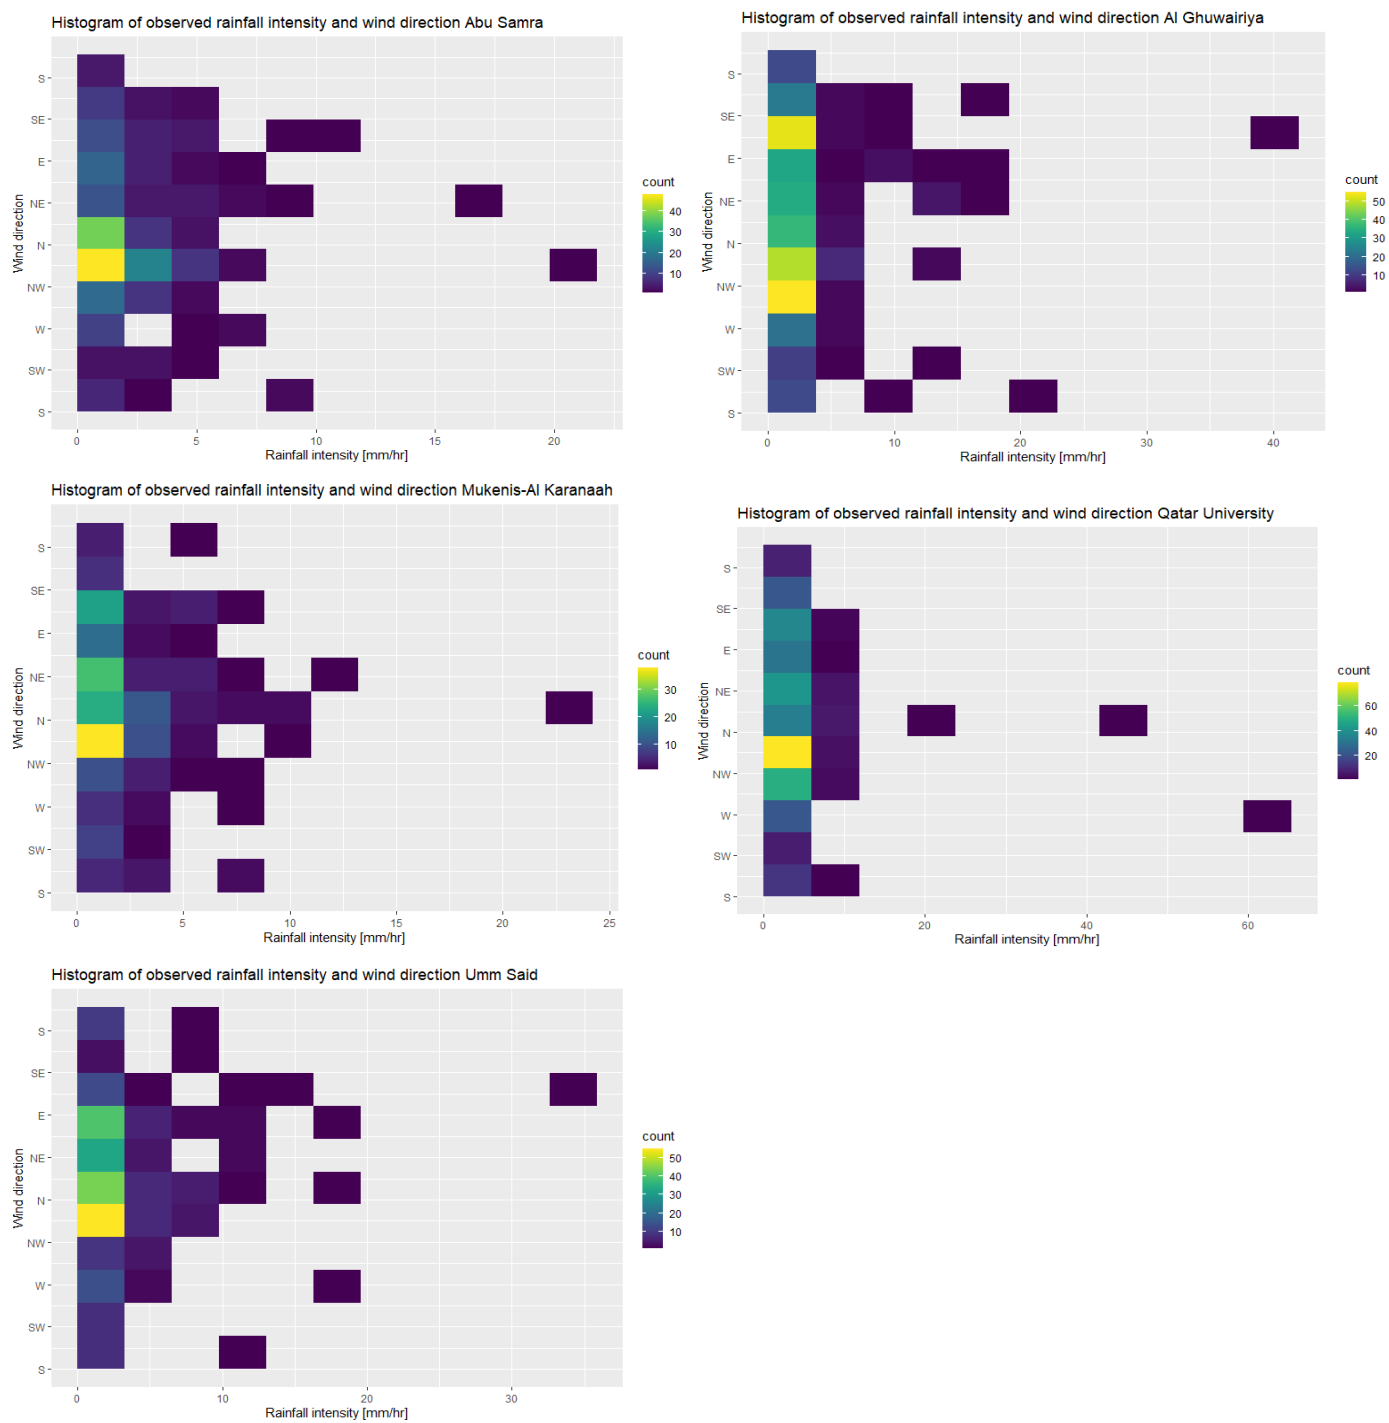

Figure S.2 The histogram of observed rainfall intensity and wind direction for the individual stations.
